# Supplementary material for: Derivation of splice junction-specific antibodies using a unique hapten targeting strategy and directed evolution
Source: PubMed Central journal article supplement — N Biotechnol. Author manuscript; Available in PMC 2022 Nov 25. (PMC9464090; doi:10.1016/j.nbt.2022.06.003), 2022-06-22
Supplement: NIHMS1833272-supplement-3.pdf [file NIHMS1833272-supplement-3.pdf]

### Supplementary Table S1. Phage display libraries used in this study.

Details regarding the phage display libraries, including naming schemes and applications herein, are provided.

| Phage Library Name | Type of Library     | ScFv Template                                                                                    | Theoretical Diversity | Application                                                                 |
|--------------------|---------------------|--------------------------------------------------------------------------------------------------|-----------------------|-----------------------------------------------------------------------------|
| AXL40              | Discovery           | unique single-framework with predetermined CDRs and four phospho-binding CDR-H2 spike-ins        | $1.0 \times 10^{10}$  | initial identification of SEP-specific scFvs                                |
| AXL41              | Discovery           | unique single-framework SEP-specific scFv with mutagenized CDR-L2, -L3, -H2, and -H3             | $1.2 \times 10^{10}$  | initial identification of SEP-specific scFvs                                |
| DEL6691            | Directed Evolution  | unique SEP-specific scFv identified from AXL40 biopanning and mutagenized using error-prone PCR  | $1.0 \times 10^8$     | evolving a SEP-specific scFv to bind to the unmodified, native epitope      |
| DEL6695            | Directed Evolution  | unique SEP-specific scFv identified from AXL40 biopanning and mutagenized using error-prone PCR  | $1.7 \times 10^8$     | evolving a SEP-specific scFv to bind to the unmodified, native epitope      |
| DEL6698            | Directed Evolution  | unique SEP-specific scFv identified from AXL41 biopanning and mutagenized using error-prone PCR  | $1.0 \times 10^8$     | evolving a SEP-specific scFv to bind to the unmodified, native epitope      |
| AML6691 Clone 1    | Affinity Maturation | unique NAT-evolved scFv identified from AML6691 biopanning and mutagenized using error-prone PCR | $7.1 \times 10^7$     | improving the affinity of an evolved scFv to the unmodified, native epitope |
| AML6691 Clone 2    | Affinity Maturation | unique NAT-evolved scFv identified from AML6691 biopanning and mutagenized using error-prone PCR | $6.3 \times 10^7$     | improving the affinity of an evolved scFv to the unmodified, native epitope |
