# Supplementary material for: Derivation of splice junction-specific antibodies using a unique hapten targeting strategy and directed evolution
Source: PubMed Central journal article supplement — N Biotechnol. Author manuscript; Available in PMC 2022 Nov 25. (PMC9464090; doi:10.1016/j.nbt.2022.06.003), 2022-06-22
Supplement: NIHMS1833272-supplement-4.pdf [file NIHMS1833272-supplement-4.pdf]

## Supplementary Table S2. Discovery phage display screening results for isolating SEP-specific scFvs.

Two naïve phage display Discovery libraries (AXL40 and AXL41) were independently screened against five SEP-containing peptides spanning the exon 2/4 splice junction of CENP-A-ΔExon3, as per Fig. 1B. 88 single clones from each of the 10 screens were expressed as secretory scFvs and tested in cell supernatant ELISAs against the corresponding SEP and NAT peptides as well as NeutrAvidin alone. “# of Hits” was determined by OD450 ≥ 0.2 against the peptide with ≥ 2-fold signal over NeutrAvidin. “# of SEP-Specific Hits” was determined by three criteria: (1) OD450 ≥ 0.2 against the SEP peptide with ≥ 2-fold signal over NeutrAvidin, (2) < 5-fold signal against the NAT peptide over NeutrAvidin, and (3) ≥ 2-fold signal against the SEP peptide over the NAT peptide. A subset of SEP-specific hits was sequenced and unique clones were identified both within and between screens. A subset of unique scFvs were purified and tested in antigen and/or scFv titration ELISAs against the corresponding SEP and NAT peptides. Clones with ≥ 5-fold background-corrected signal against the SEP peptide over the NAT peptide for at least two titration points were classified as SEP-specific (two examples are shown in Fig. 2A-B, left).

### Discovery Screening Results

|       | Discovery Screen # | ELISA Antigen Name | # of Hits (out of 88) | # of SEP-Specific Hits | % of SEP Hits that are SEP-Specific | # of SEP-Specific Hits Sequenced | # of Unique SEP-Specific Hits (within screen) | % Unique                           | # of Uniques Found in Other Screens [Screen #] | # of Uniques Tested in scFv Protein ELISA | # of SEP-Specific scFvs in Titration ELISA |
|-------|--------------------|--------------------|-----------------------|------------------------|-------------------------------------|----------------------------------|-----------------------------------------------|------------------------------------|------------------------------------------------|-------------------------------------------|--------------------------------------------|
| AXL40 | p3494              | SEP1               | 74                    | 21                     | 28%                                 | 4                                | 3                                             | 75%                                | 0                                              | 3                                         | 3                                          |
|       |                    | NAT1               | 57                    |                        |                                     |                                  |                                               |                                    |                                                |                                           |                                            |
|       | p3495              | SEP2               | 74                    | 15                     | 20%                                 | 1                                | 1                                             | 100%                               | 0                                              | 1                                         | 1                                          |
|       |                    | NAT1               | 59                    |                        |                                     |                                  |                                               |                                    |                                                |                                           |                                            |
|       | p3496              | SEP3               | 67                    | 25                     | 37%                                 | 20                               | 13                                            | 65%                                | 3 [p3497 & p3498 (x2), p3498 (x1)]             | 9                                         | 2                                          |
|       |                    | NAT2               | 48                    |                        |                                     |                                  |                                               |                                    |                                                |                                           |                                            |
| p3497 | SEP4               | 81                 | 24                    | 30%                    | 22                                  | 6                                | 27%                                           | 2 [p3496 & p3498 (x2)]             | 4                                              | 1                                         |                                            |
|       | NAT2               | 59                 |                       |                        |                                     |                                  |                                               |                                    |                                                |                                           |                                            |
| p3498 | SEP5               | 57                 | 25                    | 44%                    | 19                                  | 6                                | 32%                                           | 3 [p3496 & p3497 (x2), p3496 (x1)] | 3                                              | 1                                         |                                            |
|       | NAT2               | 30                 |                       |                        |                                     |                                  |                                               |                                    |                                                |                                           |                                            |
| AXL41 | p3500              | SEP1               | 0                     | 0                      | N/A                                 | N/A                              | N/A                                           | N/A                                | N/A                                            | N/A                                       | N/A                                        |
|       |                    | NAT1               | 2                     |                        |                                     |                                  |                                               |                                    |                                                |                                           |                                            |
|       | p3501              | SEP2               | 0                     | 0                      | N/A                                 | N/A                              | N/A                                           | N/A                                | N/A                                            | N/A                                       | N/A                                        |
|       |                    | NAT1               | 0                     |                        |                                     |                                  |                                               |                                    |                                                |                                           |                                            |
|       | p3502              | SEP3               | 71                    | 64                     | 90%                                 | 57                               | 32                                            | 56%                                | 1 [p3504 (x1)]                                 | 16                                        | 2                                          |
|       |                    | NAT2               | 10                    |                        |                                     |                                  |                                               |                                    |                                                |                                           |                                            |
| p3503 | SEP4               | 46                 | 44                    | 96%                    | 27                                  | 11                               | 41%                                           | 0                                  | 1                                              | 0                                         |                                            |
|       | NAT2               | 3                  |                       |                        |                                     |                                  |                                               |                                    |                                                |                                           |                                            |
| p3504 | SEP5               | 22                 | 12                    | 55%                    | 4                                   | 3                                | 75%                                           | 1 [p3502 (x1)]                     | 0                                              | N/A                                       |                                            |
|       | NAT2               | 12                 |                       |                        |                                     |                                  |                                               |                                    |                                                |                                           |                                            |
