# Supplementary material for: Derivation of splice junction-specific antibodies using a unique hapten targeting strategy and directed evolution
Source: PubMed Central journal article supplement — N Biotechnol. Author manuscript; Available in PMC 2022 Nov 25. (PMC9464090; doi:10.1016/j.nbt.2022.06.003), 2022-06-22
Supplement: NIHMS1833272-supplement-5.pdf [file NIHMS1833272-supplement-5.pdf]

**Supplementary Table S3. Directed Evolution phage display screening results for evolving SEP-specific scFvs to the native exon 2/4 splice junction of CENP-A-Δ Exon3.**

(A) Mutagenic scFv-displaying phage libraries (DEL6691, DEL6695 and DEL6698) were generated for three SEP-specific scFvs (see Fig. 1B and Supplementary Table S2). Recombinant rate is the fraction of library clones that contain mutation(s) in a full scFv sequence compared to the parental scFv, based on the sequencing results for 10 library clones and omitting poor sequence quality reads. Mutation rate is the average frequency of nucleotide mutations in a single library clone, based on the same sequencing results used to calculate the recombinant rate. Theoretical diversity is based on the recombinant rate, transformation efficiency, and number of transformations performed to generate the final library. (B) Each Directed Evolution library was screened against the nonphosphorylated, native exon 2/4 splice junction of CENP-A-Δ Exon3 using two strategies, as per Fig. 1C. 88 single clones per screen (44 clones per strategy) were expressed as secretory scFvs and tested in cell supernatant ELISAs against the NAT4 peptide and NeutrAvidin alone. “# of Hits” was determined by OD450 ≥ 0.2 against NAT4 with ≥ 2-fold signal over NeutrAvidin. “# of NAT-Improved Hits” was determined by ≥ 2-fold signal against NAT4 over the Discovery parental NAT4 signal. A subset of NAT-improved hits was sequenced and three unique clones were identified. All unique scFvs were purified and tested in scFv titration ELISAs against the NAT4 peptide and NeutrAvidin alone. Clones with ≥ 2-fold background-corrected signal against the NAT4 peptide over the parental NAT4 corrected signal for at least two titration points were classified as NAT-improved (as shown in Fig. 2A-B, right).

**A**  
**Directed Evolution Library QC**

| Library | Recombinant Rate | Mutation Rate | Theoretical Diversity |
|---------|------------------|---------------|-----------------------|
| DEL6691 | 67%              | 1.6%          | 1.0 x 10 <sup>8</sup> |
| DEL6695 | 89%              | 1.8%          | 1.7 x 10 <sup>8</sup> |
| DEL6698 | 100%             | 1.9%          | 1.0 x 10 <sup>8</sup> |

**B**  
**Directed Evolution Screening Results**

| Directed Evolution Library # | Directed Evolution Screen # | Discovery Screen Clonal Origin | ELISA Antigen Name | # of Hits (out of 88) | # of NAT-Improved Hits | # of NAT-Improved Hits Sequenced | # of Unique NAT-Improved Hits | % of Uniques with CDR Mutations | # of Uniques Tested in scFv Protein ELISA | # of NAT-Improved scFvs in Titration ELISA |
|------------------------------|-----------------------------|--------------------------------|--------------------|-----------------------|------------------------|----------------------------------|-------------------------------|---------------------------------|-------------------------------------------|--------------------------------------------|
| DEL6691                      | p4260                       | p3496                          | NAT4               | 78                    | 76                     | 33                               | 2                             | 100%                            | 2                                         | 2                                          |
| DEL6695                      | p4261                       | p3498                          | NAT4               | 12                    | 0                      | N/A                              | N/A                           | N/A                             | N/A                                       | N/A                                        |
| DEL6698                      | p4264                       | p3502                          | NAT4               | 2                     | 2                      | 2                                | 1                             | 100%                            | 1                                         | 1                                          |
