# Supplementary material for: Derivation of splice junction-specific antibodies using a unique hapten targeting strategy and directed evolution
Source: PubMed Central journal article supplement — N Biotechnol. Author manuscript; Available in PMC 2022 Nov 25. (PMC9464090; doi:10.1016/j.nbt.2022.06.003), 2022-06-22
Supplement: NIHMS1833272-supplement-8.pdf [file NIHMS1833272-supplement-8.pdf]

## Supplementary Table S6. Information on peptides used in this study.

All peptides were designed in-house and purchased from the listed manufacturer.

| Peptide Name | Peptide Sequence<br>(N-term > C-term)   | Purity | Conjugates                        | Manufacturer                               | Applications                                     |
|--------------|-----------------------------------------|--------|-----------------------------------|--------------------------------------------|--------------------------------------------------|
| SEP1         | GGGSGGIRKLPF <sub>SR</sub> [SEP]AAEAF   | ≥ 90%  | none or biotin                    | Biopeptek Pharmaceuticals<br>(Malvern, PA) | phage display screening<br>and ELISA validations |
| SEP2         | GGGSGGIRKLPF <sub>SRL</sub> [SEP]AEAF   | ≥ 90%  | none or biotin                    | Biopeptek Pharmaceuticals<br>(Malvern, PA) | phage display screening<br>and ELISA validations |
| SEP3         | GGGSGGLPF <sub>SR</sub> [SEP]AAEAFVHLF  | ≥ 90%  | none or biotin                    | Biopeptek Pharmaceuticals<br>(Malvern, PA) | phage display screening<br>and ELISA validations |
| SEP4         | GGGSGGLPF <sub>SRL</sub> [SEP]AEAFVHLF  | ≥ 90%  | none or biotin                    | Biopeptek Pharmaceuticals<br>(Malvern, PA) | phage display screening<br>and ELISA validations |
| SEP5         | GGGSGGLPF <sub>S</sub> [SEP]LAAEAFVHLF  | ≥ 90%  | none or biotin                    | Biopeptek Pharmaceuticals<br>(Malvern, PA) | phage display screening<br>and ELISA validations |
| NAT1         | GGGSGGIRKLPF <sub>SRLAAEAF</sub>        | ≥ 90%  | none or biotin                    | Biopeptek Pharmaceuticals<br>(Malvern, PA) | phage display screening<br>and ELISA validations |
| NAT2         | GGGSGGLPF <sub>SRLAAEAFVHLF</sub>       | ≥ 90%  | none or biotin                    | Biopeptek Pharmaceuticals<br>(Malvern, PA) | phage display screening<br>and ELISA validations |
| NAT3         | GGGSGGIRKLPF <sub>SRLAAEAFVHLF</sub>    | ≥ 90%  | none or biotin                    | Biopeptek Pharmaceuticals<br>(Malvern, PA) | phage display screening<br>and ELISA validations |
| NAT4         | GGGSGGIRKLPF <sub>SRLAAEAFVHLFEDA</sub> | ≥ 90%  | none or biotin                    | Biopeptek Pharmaceuticals<br>(Malvern, PA) | phage display screening<br>and ELISA validations |
| Exon2        | QKSTHLLIRKLPF <sub>SRLAREI</sub>        | ≥ 90%  | none or biotin                    | Biopeptek Pharmaceuticals<br>(Malvern, PA) | phage display screening<br>and ELISA validations |
| Exon4        | ALLALQEAAEAFVHLFEDA                     | ≥ 90%  | none or biotin                    | Biopeptek Pharmaceuticals<br>(Malvern, PA) | phage display screening<br>and ELISA validations |
| SEP6         | LPF <sub>SR</sub> [SEP]AAEAFVHL         | ≥ 90%  | none, carrier proteins, or biotin | LifeTein (Hillsborough, NJ)                | rabbit immunizations<br>and ELISA validations    |
| SEP7         | LPF <sub>SRLAA</sub> [SEP]AFVHL         | ≥ 90%  | none, carrier proteins, or biotin | LifeTein (Hillsborough, NJ)                | rabbit immunizations<br>and ELISA validations    |
| NAT5         | LPF <sub>SRLAAEAFVHL</sub>              | ≥ 90%  | none, carrier proteins, or biotin | LifeTein (Hillsborough, NJ)                | rabbit immunizations<br>and ELISA validations    |
| NAT6         | IRKLPF <sub>SRLAAEAFVHLFED</sub>        | ≥ 90%  | none, carrier proteins, or biotin | LifeTein (Hillsborough, NJ)                | rabbit immunizations<br>and ELISA validations    |
